# Supplementary material for: Mild Intermittent Cold Stimulation Affects Cardiac Substance Metabolism via the Neuroendocrine Pathway in Broilers
Source: MDPI journal article supplement (doi:10.3390/ani13223577), 2023-11-19
Supplement: s1 [file s1]

**Table S1:** Primer sequence.

| <b>Gene</b>                     | <b>Series number</b> | <b>Primer sequence (5'-3')</b>                             |
|---------------------------------|----------------------|------------------------------------------------------------|
| <i>CD36</i>                     | NM_001030731.1       | F: GAAGGTCTGAGCCCAAATGA<br>R: AGGTGTCACAAGGAGGTTTAC        |
| <i>EGFR</i>                     | NM_205497.3          | F: TATCCGAGGCCGAACCAAGC<br>R: GGTGTCAGCATAGCAGAGGTTCTT     |
| <i>NR4A1</i>                    | XM_046934299.1       | F: CTGCCAGTTCTGCCGCTTCC<br>R: AGAGAGGTGATGAGGCTGATGGG      |
| <i>CACNA1C</i>                  | NM_001396677.1       | F: CCAGACATTCACCACGCAGAGAC<br>R: GCATTGGAGCCTGAAGATGAGTAGC |
| <i>AKR1D1</i>                   | NM_001277393.2       | F: TCGCCATATTGACGGTGCCTTTG<br>R: GCTCTGGTGGATGACAGGTGTTC   |
| <i>TNFSF10</i>                  | NM_204379.2          | F: ACTCACAGACTTACTTTCGCTTCCG<br>R: CTGGACGAGCTGCTTGGGATTC  |
| <i>TPH2</i>                     | NM_001001301.2       | F: CGGAGGGGCTTCTCTCTGGAC<br>R: AACTGACTCGCCTTTCCCATTTCC    |
| <i>SESNI</i>                    | XM_004940327.5       | F: TGGTCCGCCTCCTGATGCTG<br>R: GATGAATCTGCTTGGTCCGTGTCC     |
| <i><math>\beta</math>-actin</i> | NM_205518.1          | F: CACCACAGCCGAGAGAGAAAT<br>R: TGACCATCAGGGAGTTCATAGC      |
| <i>PI3K</i>                     | NM_001004410.2       | F: CGGATGTTGCCTTACGGTTGT<br>R: GTTCTTGTCCTTGAGCCACTGAT     |
| <i>Akt</i>                      | XM_046941459.1       | F: TGATGGCACATTCATTGGCTAC<br>R: TGTTTGGTTTAGGTCTGTTCTGTCT  |
| <i>mTOR</i>                     | XM_040689168.2       | F: GGACTCTTCCCTGCTGGCTAA<br>R: TACGGGTGCCCTGGTTCTG         |
| <i>FOXO1</i>                    | NM_204328.2          | F: AAGGATAAGGGCGACAGCAA<br>R: ATTGAGCATCCACCAGGAAC         |
| <i>PEPCK</i>                    | NM_205471.1          | F: GGTTATGATGAGAAGTAGGT<br>R: ACAATACACAACAACACTGATG       |
| <i>G6P</i>                      | XM_003642817         | F: GCTGCTCACTTTCCTCATC<br>R: CCACCTCTGTGCCTTCTC            |
| <i>HK1</i>                      | XM_040702189.2       | F: TGCTGAGCAGAACTGAACTCC<br>R: CGGGCAGGTCTTTAGGAGAAG       |
| <i>LDHB</i>                     | NM_204177.2          | F: AAGCAGGTTGTTGAAAGTGC<br>R: AAGGCAGGCTCAGGAAGAC          |
| <i>ACCI</i>                     | NM_205505            | F: GCTGGGTTGAGCGACTAATG<br>R: GGGAAACTGGCAAAGGACTG         |
| <i>FASN</i>                     | NM_205155            | F: TGAAGGACCTTATCGCATTGC<br>R: GCATGGGAAGCATTTTGTTGT       |
| <i>SCD</i>                      | NM_204890.2          | F: CAAGTTCTCCGAGACGCATG<br>R: GGGCTTGTAGTATCTCCGCT         |
| <i>SREBP1c</i>                  | NM_204126.3          | F: GTCGGCGATCCTGAGGAA                                      |

|              |                |                            |
|--------------|----------------|----------------------------|
|              |                | R: CTCTTCTGCACGGCCATCTT    |
| <i>HSP70</i> | NM_001006685.1 | F: CGGGCAAGTTTGACCTAA      |
|              |                | R: TTGGCTCCCACCCTATCTCT    |
| <i>HSP90</i> | NM_001109785.1 | F: TCCTGTCCTGGCTTTAGTTT    |
|              |                | R: AGGTGGCATCTCCTCGGT      |
| <i>PFK</i>   | NM_204223.2    | F: GAGCCACCTGAACATCGTG     |
|              |                | R: CATCACTTCCAGCACAAACG    |
| <i>GLUT1</i> | NM_205209.2    | F: GATGGCTTTGTCCTTTGAGATGC |
|              |                | R: CAAAGATGCTGGTGGAGTAGTAG |

---
